1 **Cognitive impairment at older ages among 8000 men and women living in**  
2 **Mexico City: cross-sectional analyses of a prospective study**

3

4 Carlos González-Carballo<sup>1\*</sup>, Pablo Kuri-Morales<sup>2\*</sup>, Erwin Chiquete<sup>3</sup>, Mario Rojas-Russell<sup>4</sup>, Rogelio  
5 Santacruz-Benitez<sup>1</sup>, Raúl Ramirez-Reyes<sup>1</sup>, Adrián Garcilazo-Ávila<sup>1</sup>, Jaime Berumen<sup>1</sup>, Eirini Trichia<sup>5</sup>,  
6 Louisa Gnatiuc Friedrichs<sup>5</sup>, Paulina Orellana<sup>6,7</sup>, Carolina Ochoa-Rosales<sup>6</sup>, Gary O'Donovan<sup>8</sup>, Jonathan  
7 R Emberson<sup>4</sup>, Roberto Tapia-Conyer<sup>1</sup>, Diego Aguilar-Ramirez<sup>4†</sup>, Jesus Alegre-Díaz<sup>1†</sup>

8 \* Equal first author

9 † Equal last author

- 10 1. Experimental Research Unit from the Faculty of Medicine, National Autonomous University of  
11 Mexico, Mexico City, Mexico
- 12 2. Instituto Tecnológico y de Estudios Superiores de Monterrey, Monterrey, México
- 13 3. Instituto Nacional de Ciencias Médicas y Nutrición Salvador Zubirán, México City, México
- 14 4. Faculty of Higher Studies Zaragoza, National Autonomous University of México, México City,  
15 México
- 16 5. Clinical Trial Service Unit and Epidemiological Studies Unit, Nuffield Department of Population  
17 Health, University of Oxford, Oxford, UK
- 18 6. Latin American Brain Health Institute (BrainLat), Universidad Adolfo Ibanez, Santiago, Chile
- 19 7. Center for Social and Cognitive Neuroscience (CSCN), School of Psychology, Universidad  
20 Adolfo Ibanez, Santiago, Chile
- 21 8. Facultad de Medicina, Universidad de los Andes, Bogotá, Colombia

22

23 **Word count: 2,775**

24 **KEY POINTS**

25 **Question:** What is the distribution of cognitive impairment among adults in Mexico City?

26 **Findings:** In this cross-sectional study of 8,197 adults aged 50-89 years, the sex- and district-  
27 standardised prevalence of cognitive impairment ranged from 10% in those 50-59 years to 55% in those  
28 aged 80-89 and at any given age was higher in women than in men. There was little difference in the  
29 prevalence of cognitive impairment between participants with or without hypertension, diabetes or  
30 excess of adiposity.

31 **Meaning:** Cognitive impairment is common in adults in Mexico City. Its relevance to major morbidity  
32 and mortality deserves future research.

33 **ABSTRACT**

34 **Importance:** There is limited population-based evidence on the prevalence of cognitive impairment in  
35 Mexico, a country with a rapidly aging population and where key risk factors, such as diabetes and  
36 obesity, are common.

37 **Objective:** To describe the distribution of cognitive impairment in a sample of adults from Mexico City.

38 **Design, Setting, and Participants:** This cross-sectional population-based study included participants  
39 from the Mexico City Prospective Study which 50,000 men and 100,000 women aged  $\geq 35$  years from  
40 two districts in 1998-2004. In 2015-2019 about 10,000 survivors were resurveyed with identical  
41 information from the original survey and additional assessments including a cognitive assessment.  
42 The main analyses included those aged 50-89 years with complete cognitive assessment and  
43 covariate data at resurvey.

44 **Main outcomes and measures:** Cognition was assessed using the Mini Mental State Examination  
45 (MMSE) and those with cognitive impairment (MMSE  $\leq 24$ ) were identified. The distribution of MMSE  
46 scores and cognitive impairment by age, sex, and major disease risk factors (diabetes, hypertension,  
47 and adiposity) was analyzed among those with complete MMSE data and some degree of self-  
48 reported formal education.

49 **Results:** Of the 9,288 participants aged 50-89 years at the 2015-2019 resurvey with complete data,  
50 8,197 reported having at least some years of formal education. Among these (mean age 66 years;  
51 31% men), their mean MMSE score was 26.2 (SD 3.6) points, 1,941 (24%) had cognitive impairment,  
52 mean body-mass index (BMI) was 28.6 (SD 5.5) kg/m<sup>2</sup>, 3,008 (37%) had previously-diagnosed  
53 hypertension and 2,467 (30%) had previously-diagnosed diabetes. The sex- and district-standardised  
54 prevalence of cognitive impairment increased strongly with age, from 10% in those 50-59 years to  
55 55% in those aged 80-89. At any given age, the prevalence of cognitive impairment was higher in  
56 women than in men. After accounting for the effects of age, sex, and district there was little difference  
57 in the prevalence of cognitive impairment between participants with or without diabetes, hypertension,  
58 overweight or obesity (BMI  $\geq 25$  kg/m<sup>2</sup>), or high levels of fat mass.

59 **Conclusion and relevance:** In this population of adults aged 50-89 years from two districts of Mexico  
60 City, the prevalence of cognitive impairment was high, particularly among women. The extent to which  
61 cognitive impairment relates to health outcomes in this population needs to be investigated.

## 62 INTRODUCTION

63 Epidemiological and demographic changes in global populations have highlighted the relevance of the  
64 ageing process for the preservation of cognitive function, which has a significant effect on the  
65 independence and quality of life of older people <sup>1-3</sup>. Metabolic diseases, such as excess adiposity or  
66 type 2 diabetes, and cardiovascular diseases have been identified as risk factors for the development  
67 of cognitive impairment <sup>4-6</sup>, a condition which has been associated with an increased risk of dementia  
68 <sup>7,8</sup>. Given how rapidly populations across the world are aging, including those in understudied regions  
69 such as Latin America, there is a need for a greater understanding of the distribution of cognitive  
70 impairment and its associated risk factors in such regions.

71 Mexico is the second most populous country in Latin America at around 126 million people.<sup>9</sup> Obesity  
72 and diabetes are common in Mexico and confer an unduly high excess risk of mortality (mostly due to  
73 vascular and renal causes)<sup>10-12</sup>. Obesity<sup>13,14</sup> and diabetes<sup>15</sup> are also established risk factors for  
74 cognitive impairment and dementia. The reported prevalence of cognitive impairment in Mexico is  
75 estimated to be around 7% to 10% in those aged 65 years increasing to 27% in those aged  $\geq 85$  years  
76 <sup>16,17</sup>. However, these estimates are based on studies with very small sample sizes<sup>17</sup> or where  
77 information on cognition was not exclusively collected directly from participants but also through proxy  
78 interviews<sup>16</sup>.

79 The Mexico City Prospective Study (MCPS) recruited 150,000 participants in 1998-2004. We aimed to  
80 report the age- and sex-specific distribution of cognitive impairment and its sociodemographic,  
81 lifestyle, biological and medical health characteristics in a subset of around 9,000 MCPS participants  
82 who had cognitive function assessed during a resurvey of survivors carried out in 2015-2019.

## 83 **METHODS**

### 84 **Study design and participants**

85 Study design, sampling methods, and follow-up have been described before<sup>18</sup>. Briefly, between 1998  
86 and 2004, households in two contiguous districts in Mexico City (Coyocán and Iztapalapa) were  
87 visited and all inhabitants aged 35 and over were invited to participate in the study. Of the 112,333  
88 households visited, 106,059 (94%) yielded at least one inhabitant who consented to participate.  
89 Ethics approval was granted by the Mexican Ministry of Health, the Mexican National Council for  
90 Science and Technology, and the University of Oxford. All participants provided written informed  
91 consent.

### 92 **Data collection**

93 In the baseline measurement, during household visits, trained nurses conducted face-to-face  
94 interviews and recorded information on sociodemographic and lifestyle factors, current medications,  
95 and medical history (including previous medically diagnosed diseases such as diabetes). Blood  
96 pressure, weight, height, waist and hip circumference were measured using standard protocols, and a  
97 non-fasting venous 10 mL blood sample was collected. In 2015-2019, a repeat survey was performed  
98 in a subset of around 10,000 surviving participants. For this resurvey, streets within the two study  
99 districts in which participants were previously recruited in 1998-2004 were selected at random and  
100 then systematically revisited to identify participants who were still alive, living at the same address,  
101 and willing to take part in a further survey. Data from the resurvey were entered directly into study  
102 tablets which captured the exact time points at which each question or procedure was completed. The  
103 resurvey involved similar questions and assessments as at the original survey in 1998-2004, but with  
104 some additions. Whole-body bio-impedance measures at resurvey were recorded using a Tanita  
105 SC240-MA body composition analyzer. Cognition at resurvey was assessed using the Mini Mental  
106 State Examination (MMSE) in Latin-American Spanish<sup>19</sup>, a tool that is commonly used to identify  
107 individuals at a higher risk of cognitive impairment in clinical and population studies. The original  
108 MMSE<sup>20</sup> and the version used in this study have the same domains and scores: orientation to time (5  
109 points); orientation to place (5 points); registration (3 points); attention and calculation (5 points);  
110 recall (3 points); and, language (9 points). Cognitive impairment was defined as a score of 24 or less  
111 on the MMSE, to be consistent with previous studies in Mexican population<sup>19,21</sup>.

## 112 **Statistical analysis**

113 Analyses were limited to resurveyed individuals whose cognitive status was assessed with the  
114 MMSE. The few participants who were aged below 50 years or were aged 90 years or above were  
115 excluded. We also excluded anyone with an MMSE score of zero, anyone with an MMSE  
116 questionnaire duration less than 1 minute or longer than 30 minutes, and anyone with a missing self-  
117 reported education (**Supplementary Table 1**).

118 Initial analyses plotted the distributions of MMSE score and of cognitive impairment at different ages  
119 across groups of educational attainment reported at resurvey (i.e., without formal education,  
120 incomplete primary education, complete primary education, secondary education, and tertiary  
121 education). As having no formal education strongly limited the ability of participants to complete the  
122 MMSE questionnaire reliably (**Supplementary Figure 1**), the main analyses were limited to the large  
123 proportion of participants with some degree of formal education. (Analyses including those reporting  
124 no formal education are provided as sensitivity analyses.)

125 The prevalence of cognitive impairment and the mean MMSE scores (with 95% confidence intervals)  
126 were plotted separately in men and women across equally sized age groups (~1000 women and ~500  
127 men in each group). To obtain standardised estimates, the prevalence of cognitive impairment was  
128 first calculated separately in men and women at ages 50-59, 60-69, 70-79, and 80-89 years. These  
129 eight age- and sex-specific estimates were obtained by averaging the group-specific prevalences in  
130 participants residing in Coyoacán and in Iztapalapa, yielding district-standardised estimates. These  
131 were then averaged to calculate the overall age-, sex- and district-uniformly-standardised prevalence  
132 at ages 50-89 years.

133 Finally, to assess how the prevalence of cognitive impairment varied in those with and without key risk  
134 factors, while accounting for variation due to age, sex, and district of residence, sex- and district-  
135 standardised prevalences across equally-sized age groups were calculated in those with and without  
136 such factors. The factors included previously-diagnosed diabetes (i.e., a self-reported medical  
137 diagnosis or treatment of diabetes), previously-diagnosed hypertension (i.e., a self-reported medical  
138 diagnosis or treatment of hypertension), overweight or obesity (i.e., a body-mass index of 25 kg/m<sup>2</sup> or  
139 above) and high impedance-measured fat mass (i.e., those at the top half of the distribution of fat  
140 mass). Analyses were conducted using R (version 4.3.2).

141 **RESULTS**

142 Of the 159,755 participants recruited at baseline from 1998 to 2005, 10,144 were resurveyed in 2015-  
143 2019. Of these, 388 participants were aged 49 years or below or 90 years or above at resurvey, 218  
144 had missing MMSE score, 370 had a very short or very long MMSE questionnaire duration, and 126  
145 had missing data on education, and were excluded. Of the remaining 9,288 men and women aged 50  
146 to 89 years, 1,091 reported not having had any formal education and were removed (**Supplementary**  
147 **Figure 1**), leaving 8,197 participants for the main analyses.

148 **Table 1** shows the characteristics at resurvey of the 2,565 men and 5,632 women aged 50 to 89  
149 years who reported having some level of formal education. In these participants, the mean (SD)  
150 MMSE score was 26.2 (3.6) in both men and women (**Supplementary Figure 2**), the mean (SD) age  
151 was 66 (9.7) years, about half were residents of Coyoacán, and 11% had completed tertiary-level  
152 education. About one in six (14%) were current smokers, nearly half (44%) were current drinkers, and  
153 17% engaged in leisure-time physical activity at least 3 times per week. In the study population,  
154 obesity, hypertension, and diabetes were common. The mean (SD) body-mass index (BMI) was 28.6  
155 (5.5) kg/m<sup>2</sup>, about half of the population (42%) had BMI between 25 and 29.9 kg/m<sup>2</sup>, and one-third  
156 (35%) had a BMI ≥30 kg/m<sup>2</sup>; the mean (SD) systolic blood pressure (SBP) was 132 (22) mmHg and  
157 about a third (30%) had previously diagnosed diabetes. Compared with women, men were more likely  
158 to have tertiary-level education (13% vs 9%) to smoke (24% vs 10%), and to drink alcohol (56% vs  
159 38%). However, women, on average, had higher BMI (29.2 vs 27.5 kg/m<sup>2</sup>) and were more likely to  
160 have previously diagnosed hypertension (39% vs 32%) than men.

161 Of all 8,197 participants included in the main analyses, 1,941 (23%) had an MMSE score ≤24  
162 consistent with cognitive impairment. Those with cognitive impairment were, on average, about 8  
163 years older than those without (72 [9.8] vs 64 [8.9]), were more likely to be residents of Coyoacán  
164 (58% vs 50%) and had lower educational attainment (2% vs 13% with tertiary-level education). They  
165 were also more likely to be widowed (32% vs 18%), and less likely to smoke (11% vs 16%), drink  
166 (33% vs 47%), or exercise (12% vs 18% had leisure-time physical activity ≥3 times per week).  
167 Participants with cognitive impairment also had a lower BMI (28.0 vs 28.8 kg/m<sup>2</sup>), were less likely to  
168 have obesity (31% vs 36%) and were more likely to have previously diagnosed hypertension (43% vs  
169 35%) and previously diagnosed diabetes (33% vs 29%).

170 *Age and sex specific prevalence of cognitive impairment*

171 The overall age-, sex-, and district-standardised prevalence of cognitive impairment at ages 50-89  
172 years was 29% and was moderately higher in women (31%) than in men (26%) (**Table 2**). In both  
173 men and women, the prevalence increased steeply with age, from 8% at ages 50-59 years to 52% at  
174 ages 80-89 years in men and, just as steeply, from 12% at ages 50-59 years to 59% at ages 80-89  
175 years in women (**Table 2 and Figure 1**). When averaged across men and women, the mean MMSE  
176 score reduced from 27.6 (2.3) at ages 50-59 years to 23.0 (4.8) at ages 80-89 years.

177 *Cognitive impairment by key metabolic risk factors*

178 After standardising for age, sex, and district of residence, there was little to no difference in the  
179 prevalence of cognitive impairment in individuals with key metabolic risk factors compared with those  
180 without (**Figure 2**). At every given age, the sex- and district-standardised prevalence of cognitive  
181 status was broadly similar in individuals with and without previously diagnosed hypertension, with and  
182 without a BMI  $\geq 25$  kg/m<sup>2</sup>, and with and without a fat mass above the sex-specific median (>19.2 kg in  
183 men or >24.4 kg in women). There was some suggestion that the prevalence of cognitive impairment  
184 between ages 60 and 75 was slightly higher in those with versus without previously-diagnosed  
185 diabetes, but such differences were not seen at either younger or older ages.

186 ***Sensitivity Analyses***

187 The prevalence of cognitive impairment showed similar distributions by age and sex in residents from  
188 the two districts, but the overall age- and sex-standardised prevalence was higher in Coyoacán (32%)  
189 than in Iztapalapa (25%) (**Supplementary Table 2**). When considering all the population with and  
190 without formal education, the overall sex- and district-standardised prevalence increased to 35%  
191 (31% in men and 39% in women; **Supplementary Table 3**).



## 192 **DISCUSSION**

193 This study describes the distribution of cognitive impairment among 9000 participants of the Mexico  
194 City Prospective Study whose cognition was assessed with the Mini-Mental State Examination in  
195 2015-2019. The uniformly-standardised prevalence of cognitive impairment at age 50-89 years was  
196 29% overall, increasing from 10% at ages 50-59 years to 55% at ages 80-89 years, and was higher in  
197 women than in men overall (31% vs 26%, respectively) and at every given age. After accounting for  
198 age, sex and district of residence, the prevalence of cognitive impairment was broadly similar in those  
199 with vs without previously diagnosed diabetes, hypertension, BMI  $\geq 25$  kg/m<sup>2</sup>, or an above-average fat  
200 mass. Overall, the findings from this study highlight that, in this urban Mexican population, cognitive  
201 impairment is common.

202 This study builds on previous studies of cognitive impairment in Mexico. While it is difficult to compare  
203 directly, other studies in the Mexican population have reported a wide range of prevalences of  
204 cognitive impairment in adults (7%-34%). Differences across studies may be explained by different  
205 study characteristics (particularly differences in age which may not have been accounted for through  
206 standardization), different tools used for identifying cognitive impairment, and, in some cases, limited  
207 study sample size (which can yield unreliable estimates) <sup>5,22,23</sup>. Our results are similar to those  
208 reported by a study that used data from the Mexican Health and Aging Study (MHAS), which included  
209 10,000 adults aged 60 years or above from different regions in Mexico. In this study <sup>24</sup>, cognition was  
210 evaluated in 2015 with the Cross-Cultural Cognitive Evaluation questionnaire (CCCE) through either  
211 direct or proxy interviews. The prevalence of any cognitive alteration (i.e., cognitive impairment or  
212 dementia) was 20% and increased with age (17% at ages 60-75 years and 30% at ages >75 years).  
213 Another study that used data from a subsample of 1,800 MHAS participants assessed in 2015,  
214 reported a 34% prevalence of cognitive impairment in adults aged 60 years or above, perhaps  
215 because more comprehensive assessments were used to identify those with cognitive impairment <sup>6</sup>.  
216 Pooled together, our study further suggest that cognitive impairment is common among adults in  
217 Mexico City and highlights the steep increase in its prevalence as individuals age.

218 Consistent with previous studies, we found a higher prevalence of cognitive impairment in women  
219 than men.<sup>6,24</sup> There are many reasons why women may be more likely to develop cognitive  
220 impairment than men, particularly in low and middle-income countries. In the current study, individuals  
221 were born between ~1925 and ~1965. During this period, women in Mexico may have had lower

222 opportunities to access higher levels of education than men, a strong risk factor for developing  
223 cognitive impairment. Women in the current study were slightly less likely than men to have tertiary-  
224 level education for instance. Women in Mexico may also be more likely to be unpaid for their labour,  
225 have poorer career progression opportunities and less likely to be economically independent than  
226 men<sup>25</sup>. Such factors have been associated with higher risk of cognitive impairment <sup>26</sup>. While it is not  
227 fully understood how low education and socio-economic status lead to cognitive impairment, it is  
228 hypothesized that these factors limit the development of cognitive reserve in early and middle-life  
229 which could be protective of dementia <sup>27</sup>. It is also likely that socio-economic status can increase the  
230 risk of cognitive impairment (and dementia) due to social disparities in smoking, alcohol intake,  
231 physical activity, adiposity, elevated blood pressure, and diabetes all of which are established risk  
232 factors for dementia <sup>28</sup>. Overall, our findings highlight the potential benefits of addressing gender and  
233 socio-economic disparities to close health gaps.

234 After accounting for age, there was little difference in the prevalence of cognitive impairment in those  
235 with vs without hypertension or excess of adiposity. This may be expected if presence of these risk  
236 factors in early and middle-life is more relevant to cognitive impairment than presence in older age.  
237 This may be particularly relevant for adiposity, for which long-term prospective evidence has shown  
238 that those who develop dementia can lose weight many years before the diagnosis of the disease <sup>29</sup>.  
239 Those with diabetes had a marginally higher prevalence of cognitive impairment than those without  
240 diabetes (at least between ages 60 to 75 years), but further research is needed to establish the extent  
241 to which diabetes may result in cognitive impairment in this population.

242 This study has several strengths, not least that it provides population-based prevalence estimates of  
243 cognitive impairment in an understudied population. Information was collected by trained health  
244 professionals using standardised procedures. While the tool used to assess cognition (MMSE) was  
245 developed in an English-speaking population from a high-income country, it has previously been  
246 validated for use in Spanish-speaking individuals <sup>19</sup>. Although the full-length version of the MMSE was  
247 used, this tool substantially underestimates cognition level in individuals with little to no literacy skills  
248 (as certain tasks involve reading or writing). For this reason, we excluded from our main analyses  
249 participants who reported not having had any formal education. However, as a consequence of  
250 restricting our analyses to those who reported having at least some formal education, we may have  
251 even underestimated the true prevalence of cognitive impairment in the whole population. By design,

252 the Mexico City Prospective Study is not representative of the whole population of Mexico. However,  
253 the standardised prevalence estimates, including age-, and sex-specific estimates, within this report  
254 facilitate comparison with other existing and future estimates and represent a valuable contribution to  
255 the epidemiological characterization of cognitive impairment in Mexico.

256 In conclusion, in this cross-sectional population-based study of Mexican adults aged 50-89 years, the  
257 prevalence of cognitive impairment assessed in 2015-2019 was high, particularly among women, and  
258 increased steeply with age. The extent to which cognitive impairment relates to health outcomes in  
259 this population needs to be investigated.

260

261 **Contributors**

262 PK-M, JA-D, and RT-C established the cohort. PK-M, JRE, JA-D, and RT-C obtained funding. All  
263 authors contributed to data acquisition, analysis, or interpretation of data. CG-C and DA-R drafted the  
264 first version of the manuscript. All authors contributed to the critical revision of the manuscript for  
265 important intellectual content. All authors have seen and approved the final version and agreed to its  
266 publication. CG-C and DA-R had full access to all the data in the study, verified the underlying data,  
267 and take responsibility for the integrity of the data and the accuracy of the analysis.

268 **Declaration of interests**

269 We declare no competing interests.

270 **Disclosures**

271 An unauthorised version of the Spanish MMSE was used by the MCPS study team without  
272 permission. The MMSE is a copyrighted instrument and may not be used or reproduced in whole or in  
273 part, in any form or language, or by any means without written permission of PAR.

274 **Data sharing**

275 The Mexico City Prospective Study reflects a long-standing collaboration between researchers at the  
276 National Autonomous University of Mexico and the University of Oxford. Data from the Mexico City  
277 Prospective Study are available to bona fide researchers. The study's Data and Sample Sharing  
278 policy can be downloaded (in English or Spanish: <https://www.ctsu.ox.ac.uk/research/mcps>). Available  
279 study data can be examined in detail through the study's Data Showcase  
280 (<https://datashare.ndph.ox.ac.uk/mexico/>).

281 **Acknowledgments**

282 We thank the study participants. The Mexico City Prospective Study has received funding from the  
283 Mexican Health Ministry, the National Council of Science and Technology for Mexico, the Wellcome  
284 Trust (058299/Z/99), Cancer Research UK, the British Heart Foundation (RE/13/1/30181), and the UK  
285 Medical Research Council (MC\_UU\_00017/2).

286 **Rights retention statement**

287 For the purposes of open access, the authors have applied a Creative Commons Attribution (CC BY)  
288 licence to any Author Accepted Manuscript version arising.

289 **References**

- 290 1. Cheng ST. Defining successful aging: the need to distinguish pathways from outcomes. *Int Psychogeriatr.*  
291 2014;26(4):527-531. doi:10.1017/S1041610213001713
- 292 2. Manrique-Espinoza B, Salinas-Rodríguez A, Margarita Moreno-Tamayo K. Condiciones de salud y estado  
293 funcional de los adultos mayores en México. *Salud Pública México.* 2013;55(Supl.2):323.  
294 doi:10.21149/spm.v55s2.5131
- 295 3. Hambleton IR, Caixeta R, Jeyaseelan SM, Luciani S, Hennis AJM. The rising burden of non-communicable  
296 diseases in the Americas and the impact of population aging: a secondary analysis of available data.  
297 *Lancet Reg Health - Am.* 2023;21:100483. doi:10.1016/j.lana.2023.100483
- 298 4. Cheng G, Huang C, Deng H, Wang H. Diabetes as a risk factor for dementia and mild cognitive  
299 impairment: a meta-analysis of longitudinal studies: Diabetes and cognitive function. *Intern Med J.*  
300 2012;42(5):484-491. doi:10.1111/j.1445-5994.2012.02758.x
- 301 5. Milani SA, Lopez DS, Downer B, Samper-Ternent R, Wong R. Effects of diabetes and obesity on cognitive  
302 impairment and mortality in older mexicans. *Arch Gerontol Geriatr.* 2022;99:104581.  
303 doi:10.1016/j.archger.2021.104581
- 304 6. Arce Rentería M, Manly JJ, Vonk JMJ, et al. Midlife Vascular Factors and Prevalence of Mild Cognitive  
305 Impairment in Late-Life in Mexico. *J Int Neuropsychol Soc.* 2022;28(4):351-361.  
306 doi:10.1017/S1355617721000539
- 307 7. Plassman BL. Prevalence of Cognitive Impairment without Dementia in the United States. *Ann Intern*  
308 *Med.* 2008;148(6):427. doi:10.7326/0003-4819-148-6-200803180-00005
- 309 8. Mejía S, Miguel A, Gutiérrez LM, Villa AR, Ostrosky-Solis F. Comparative Analysis of Cognitive  
310 Impairment Among Mexicans and Spanish-Speaking Immigrant's Elders. *J Aging Health.* 2006;18(2):292-  
311 314. doi:10.1177/0898264305285665
- 312 9. World Population Prospects - Population Division - United Nations. Accessed February 28, 2024.  
313 <https://population.un.org/wpp/>
- 314 10. Alegre-Díaz J, Herrington W, López-Cervantes M, et al. Diabetes and Cause-Specific Mortality in Mexico  
315 City. *N Engl J Med.* 2016;375(20):1961-1971. doi:10.1056/NEJMoa1605368
- 316 11. Gnatiuc L, Alegre-Díaz J, Halsey J, et al. Adiposity and Blood Pressure in 110 000 Mexican Adults.  
317 *Hypertension.* 2017;69(4):608-614. doi:10.1161/HYPERTENSIONAHA.116.08791
- 318 12. Tapia-Conyer R, Alegre-Díaz J, Gnatiuc L, et al. Association of Blood Pressure With Cause-Specific  
319 Mortality in Mexican Adults. *JAMA Netw Open.* 2020;3(9):e2018141.  
320 doi:10.1001/jamanetworkopen.2020.18141
- 321 13. Kivimäki M, Luukkonen R, Batty GD, et al. Body mass index and risk of dementia: Analysis of individual-  
322 level data from 1.3 million individuals. *Alzheimers Dement.* 2018;14(5):601-609.  
323 doi:10.1016/j.jalz.2017.09.016
- 324 14. Albanese E, Launer LJ, Egger M, et al. Body mass index in midlife and dementia: Systematic review and  
325 meta-regression analysis of 589,649 men and women followed in longitudinal studies. *Alzheimers*  
326 *Dement Diagn Assess Dis Monit.* 2017;8(1):165-178. doi:10.1016/j.dadm.2017.05.007

- 327 15. Chatterjee S, Peters SAE, Woodward M, et al. Type 2 Diabetes as a Risk Factor for Dementia in Women  
328 Compared With Men: A Pooled Analysis of 2.3 Million People Comprising More Than 100,000 Cases of  
329 Dementia. *Diabetes Care*. 2016;39(2):300-307. doi:10.2337/dc15-1588
- 330 16. Mejia-Arango S, Gutierrez LM. Prevalence and Incidence Rates of Dementia and Cognitive Impairment  
331 No Dementia in the Mexican Population: Data From the Mexican Health and Aging Study. *J Aging*  
332 *Health*. 2011;23(7):1050-1074. doi:10.1177/0898264311421199
- 333 17. Mendoza AJ, Milo MM, Arriaga MCT, Torres EC, López DLI, Cruz AG. Probable deterioro cognitivo  
334 asociado a factores de riesgo en población mayor de 40 años. 2011;10(3).
- 335 18. Tapia-Conyer R, Kuri-Morales P, Alegre-Díaz J, et al. Cohort Profile: The Mexico City Prospective Study.  
336 *Int J Epidemiol*. 2006;35(2):243-249. doi:10.1093/ije/dyl042
- 337 19. Beaman SRD, Beaman PE, Garcia-Peña C, et al. Validation of a Modified Version of the Mini-Mental State  
338 Examination (MMSE) in Spanish. *Aging Neuropsychol Cogn*. 2004;11(1):1-11.  
339 doi:10.1076/anec.11.1.1.29366
- 340 20. Folstein MF, Folstein SE, McHugh PR. "Mini-mental state." *J Psychiatr Res*. 1975;12(3):189-198.  
341 doi:10.1016/0022-3956(75)90026-6
- 342 21. Patnode CD, Perdue LA, Rossom RC, et al. Screening for Cognitive Impairment in Older Adults: Updated  
343 Evidence Report and Systematic Review for the US Preventive Services Task Force. *JAMA*.  
344 2020;323(8):764. doi:10.1001/jama.2019.22258
- 345 22. Olaiz G, Rivera J, Shamah T, Rojas R, Villalpando S, Hernández M,. *Encuesta Nacional de Salud y*  
346 *Nutrición, Resultados Nacionales 2012.*; 2012.
- 347 23. Juarez-Cedillo T, Sanchez-Arenas R, Sanchez-Garcia S, et al. Prevalence of Mild Cognitive Impairment and  
348 Its Subtypes in the Mexican Population. *Dement Geriatr Cogn Disord*. 2012;34(5-6):271-281.  
349 doi:10.1159/000345251
- 350 24. Mejia-Arango S, Avila J, Downer B, et al. Effect of Demographic and Health Dynamics on Cognitive Status  
351 in Mexico between 2001 and 2015: Evidence from the Mexican Health and Aging Study. *Geriatrics*.  
352 2021;6(3):63. doi:10.3390/geriatrics6030063
- 353 25. Ramos ME, Gibaja-Romero DE, Ochoa SA. Gender inequality and gender-based poverty in Mexico.  
354 *Heliyon*. 2020;6(1):e03322. doi:10.1016/j.heliyon.2020.e03322
- 355 26. Chung W, Kim R. Which Occupation is Highly Associated with Cognitive Impairment? A Gender-Specific  
356 Longitudinal Study of Paid and Unpaid Occupations in South Korea. *Int J Environ Res Public Health*.  
357 2020;17(21):7749. doi:10.3390/ijerph17217749
- 358 27. Stern Y. Cognitive reserve in ageing and Alzheimer's disease. *Lancet Neurol*. 2012;11(11):1006-1012.  
359 doi:10.1016/S1474-4422(12)70191-6
- 360 28. Livingston G, Huntley J, Sommerlad A, et al. Dementia prevention, intervention, and care: 2020 report of  
361 the Lancet Commission. *The Lancet*. 2020;396(10248):413-446. doi:10.1016/S0140-6736(20)30367-6
- 362 29. Singh-Manoux A, Dugravot A, Shipley M, et al. Obesity trajectories and risk of dementia: 28 years of  
363 follow-up in the Whitehall II Study. *Alzheimers Dement*. 2018;14(2):178-186.  
364 doi:10.1016/j.jalz.2017.06.2637

**Table 1. Characteristics at resurvey of 8,197 men and women aged 50-89 with MMSE information and some level of education, by cognitive impairment status (MMSE ≤24)**

|                                                      | Men                                        |                                                |                  | Women                                       |                                                |                    | Overall                                     |                                                |                           |
|------------------------------------------------------|--------------------------------------------|------------------------------------------------|------------------|---------------------------------------------|------------------------------------------------|--------------------|---------------------------------------------|------------------------------------------------|---------------------------|
|                                                      | With cognitive impairment MMSE ≤24 (N=588) | Without cognitive impairment MMSE >24 (N=1977) | All men (N=2565) | With cognitive impairment MMSE ≤24 (N=1353) | Without cognitive impairment MMSE >24 (N=4279) | All women (N=5632) | With cognitive impairment MMSE ≤24 (N=1941) | Without cognitive impairment MMSE >24 (N=6256) | All participants (N=8197) |
| <b>MMSE, score</b>                                   | 20.8 (3.4)                                 | 27.8 (1.6)                                     | 26.2 (3.6)       | 21.1 (3.2)                                  | 27.9 (1.6)                                     | 26.2 (3.6)         | 21.0 (3.2)                                  | 27.9 (1.6)                                     | 26.2 (3.6)                |
| <b>Age, years</b>                                    | 74 (9.4)                                   | 65 (9.3)                                       | 67 (9.9)         | 71 (9.9)                                    | 63 (8.7)                                       | 65 (9.5)           | 72 (9.8)                                    | 64 (8.9)                                       | 66 (9.7)                  |
| <b>Socio-economic status and lifestyle behaviors</b> |                                            |                                                |                  |                                             |                                                |                    |                                             |                                                |                           |
| Resident of Coyoacán                                 | 368 (63%)                                  | 1049 (53%)                                     | 1417 (55%)       | 766 (57%)                                   | 2065 (48%)                                     | 2831 (50%)         | 1134 (58%)                                  | 3114 (50%)                                     | 4248 (52%)                |
| Education                                            |                                            |                                                |                  |                                             |                                                |                    |                                             |                                                |                           |
| Unfinished primary                                   | 277 (47%)                                  | 282 (14%)                                      | 559 (22%)        | 766 (57%)                                   | 754 (18%)                                      | 1520 (27%)         | 1043 (54%)                                  | 1036 (17%)                                     | 2079 (25%)                |
| Completed primary                                    | 230 (39%)                                  | 691 (35%)                                      | 921 (36%)        | 447 (33%)                                   | 1702 (40%)                                     | 2149 (38%)         | 677 (35%)                                   | 2393 (38%)                                     | 3070 (37%)                |
| Completed secondary                                  | 67 (11%)                                   | 676 (34%)                                      | 743 (29%)        | 106 (8%)                                    | 1332 (31%)                                     | 1438 (26%)         | 173 (9%)                                    | 2008 (32%)                                     | 2181 (27%)                |
| Completed tertiary                                   | 14 (2%)                                    | 328 (17%)                                      | 342 (13%)        | 34 (3%)                                     | 491 (11%)                                      | 525 (9%)           | 48 (2%)                                     | 819 (13%)                                      | 867 (11%)                 |
| Widowed                                              | 126 (21%)                                  | 208 (11%)                                      | 334 (13%)        | 490 (36%)                                   | 896 (21%)                                      | 1386 (25%)         | 616 (32%)                                   | 1104 (18%)                                     | 1720 (21%)                |
| Current smoker                                       | 117 (20%)                                  | 509 (26%)                                      | 626 (24%)        | 88 (7%)                                     | 465 (11%)                                      | 553 (10%)          | 205 (11%)                                   | 974 (16%)                                      | 1179 (14%)                |
| Current drinker                                      | 241 (41%)                                  | 1182 (60%)                                     | 1423 (56%)       | 404 (30%)                                   | 1761 (41%)                                     | 2165 (38%)         | 645 (33%)                                   | 2943 (47%)                                     | 3588 (44%)                |
| Leisure-time physical activity, ≥3 times per week    | 93 (16%)                                   | 406 (21%)                                      | 499 (20%)        | 139 (10%)                                   | 716 (17%)                                      | 855 (15%)          | 232 (12%)                                   | 1122 (18%)                                     | 1354 (17%)                |
| <b>Physical measurements*</b>                        |                                            |                                                |                  |                                             |                                                |                    |                                             |                                                |                           |
| Body-mass Index, kg/m <sup>2</sup>                   | 26.9 (5.0)                                 | 27.7 (5.0)                                     | 27.5 (5.0)       | 28.4 (5.9)                                  | 29.4 (5.6)                                     | 29.2 (5.7)         | 28.0 (5.7)                                  | 28.8 (5.5)                                     | 28.6 (5.5)                |
| BMI 25-29.9                                          | 206 (46%)                                  | 772 (49%)                                      | 978 (48%)        | 395 (38%)                                   | 1399 (40%)                                     | 1794 (39%)         | 601 (40%)                                   | 2171 (43%)                                     | 2772 (42%)                |
| BMI ≥30                                              | 92 (20%)                                   | 402 (26%)                                      | 494 (24%)        | 366 (35%)                                   | 1444 (41%)                                     | 1810 (40%)         | 458 (31%)                                   | 1846 (36%)                                     | 2304 (35%)                |
| Waist-to-hip ratio, cm                               | 0.99 (0.083)                               | 0.98 (0.057)                                   | 0.98 (0.064)     | 0.94 (0.074)                                | 0.92 (0.068)                                   | 0.93 (0.070)       | 0.95 (0.079)                                | 0.94 (0.069)                                   | 0.94 (0.072)              |
| Fat mass, kg                                         | 18.5 (8.2)                                 | 20.5 (8.5)                                     | 20.1 (8.4)       | 23.1 (9.7)                                  | 25.8 (9.5)                                     | 25.2 (9.6)         | 21.7 (9.5)                                  | 24.2 (9.5)                                     | 23.6 (9.5)                |
| Muscle mass, kg                                      | 48.0 (7.1)                                 | 50.6 (6.9)                                     | 50.0 (7.1)       | 37.3 (4.8)                                  | 38.9 (4.6)                                     | 38.5 (4.7)         | 40.5 (7.4)                                  | 42.5 (7.7)                                     | 42.1 (7.7)                |
| <b>Blood pressure</b>                                |                                            |                                                |                  |                                             |                                                |                    |                                             |                                                |                           |
| SBP, mmHg                                            | 135.8 (23.8)                               | 132.5 (20.7)                                   | 133.2 (21.5)     | 136.9 (24.2)                                | 130.1 (21.0)                                   | 131.7 (22.0)       | 136.5 (24.0)                                | 130.9 (20.9)                                   | 132.2 (21.8)              |
| DBP, mmHg                                            | 78.4 (11.8)                                | 80.9 (11.0)                                    | 80.3 (11.3)      | 79.0 (11.3)                                 | 79.8 (10.6)                                    | 79.6 (10.8)        | 78.8 (11.4)                                 | 80.1 (10.7)                                    | 79.8 (10.9)               |
| Previously diagnosed or treated hypertension         | 217 (37%)                                  | 593 (30%)                                      | 810 (32%)        | 613 (45%)                                   | 1585 (37%)                                     | 2198 (39%)         | 830 (43%)                                   | 2178 (35%)                                     | 3008 (37%)                |
| <b>Diabetes</b>                                      |                                            |                                                |                  |                                             |                                                |                    |                                             |                                                |                           |
| HbA1c, %                                             | 5.7 [5.4-6.5]                              | 5.6 [5.4-6.4]                                  | 5.7 [5.4-6.4]    | 5.8 [5.4-6.6]                               | 5.7 [5.4-6.4]                                  | 5.7 [5.4-6.5]      | 5.8 [5.4-6.6]                               | 5.7 [5.4-6.4]                                  | 5.7 [5.4-6.5]             |
| Previously diagnosed or treated diabetes             | 193 (33%)                                  | 544 (28%)                                      | 737 (29%)        | 456 (34%)                                   | 1274 (30%)                                     | 1730 (31%)         | 649 (33%)                                   | 1818 (29%)                                     | 2467 (30%)                |

MMSE, Mini-Mental State Examination; BMI, body mass index; SBP, systolic blood pressure; DBP, diastolic blood pressure; SD, standard deviation; IQR, interquartile range. Numbers shown are *n* (%), mean (SD) or median (IQR). Exclusion criteria described in Supplementary Table 1. Missing data percentages were: BMI (20%), waist-hip-ratio (3%), fat mass (19%), muscle mass (19%), and blood pressure (1%).

**Table 2. Age- and sex-specific mean MMSE score and prevalences of cognitive impairment in 8,197 participants aged 50 to 89 years at resurvey who reported having had at least some level of formal education**

| Age group  | Men         |                      |                 | Women       |                      |                 | Overall     |                      |                 |
|------------|-------------|----------------------|-----------------|-------------|----------------------|-----------------|-------------|----------------------|-----------------|
|            | <i>n</i>    | MMSE<br>mean<br>(SD) | Prevalence<br>% | <i>n</i>    | MMSE<br>mean<br>(SD) | Prevalence<br>% | <i>N</i>    | MMSE<br>mean<br>(SD) | Prevalence<br>% |
| 50-59      | 695         | 27.6 (2.2)           | 8               | 1828        | 27.5 (2.5)           | 12              | 2523        | 27.6 (2.4)           | 10              |
| 60-69      | 804         | 27 (2.9)             | 16              | 1990        | 26.7 (2.9)           | 19              | 2794        | 26.9 (2.9)           | 18              |
| 70-79      | 724         | 25.5 (3.8)           | 30              | 1286        | 25.2 (3.7)           | 34              | 2010        | 25.3 (3.8)           | 32              |
| 80-89      | 342         | 23.3 (4.6)           | 52              | 528         | 22.6 (5)             | 59              | 870         | 23.0 (4.8)           | 55              |
| <b>All</b> | <b>2565</b> | <b>25.9 (3.4)</b>    | <b>26</b>       | <b>5632</b> | <b>25.5 (3.5)</b>    | <b>31</b>       | <b>8197</b> | <b>25.7 (3.5)</b>    | <b>29</b>       |

MMSE, Mini-Mental State Examination. Cognitive impairment is defined as MMSE score  $\leq 24$ .

Age- and sex-specific estimates are the simple average of such estimates in each district, giving district-standardised estimates. For men and for women, the four district-standardised age-specific estimates are subsequently averaged to give age- and district-standardised sex-specific estimates. Then, the eight district-standardised age- and sex-specific estimates are averaged to give an overall uniformly-standardised estimate.



**Figure 1. District-standardised sex-specific prevalences of cognitive impairment and mean MMSE score in 8,197 participants aged 50 to 89 years who reported having had some level of formal education**

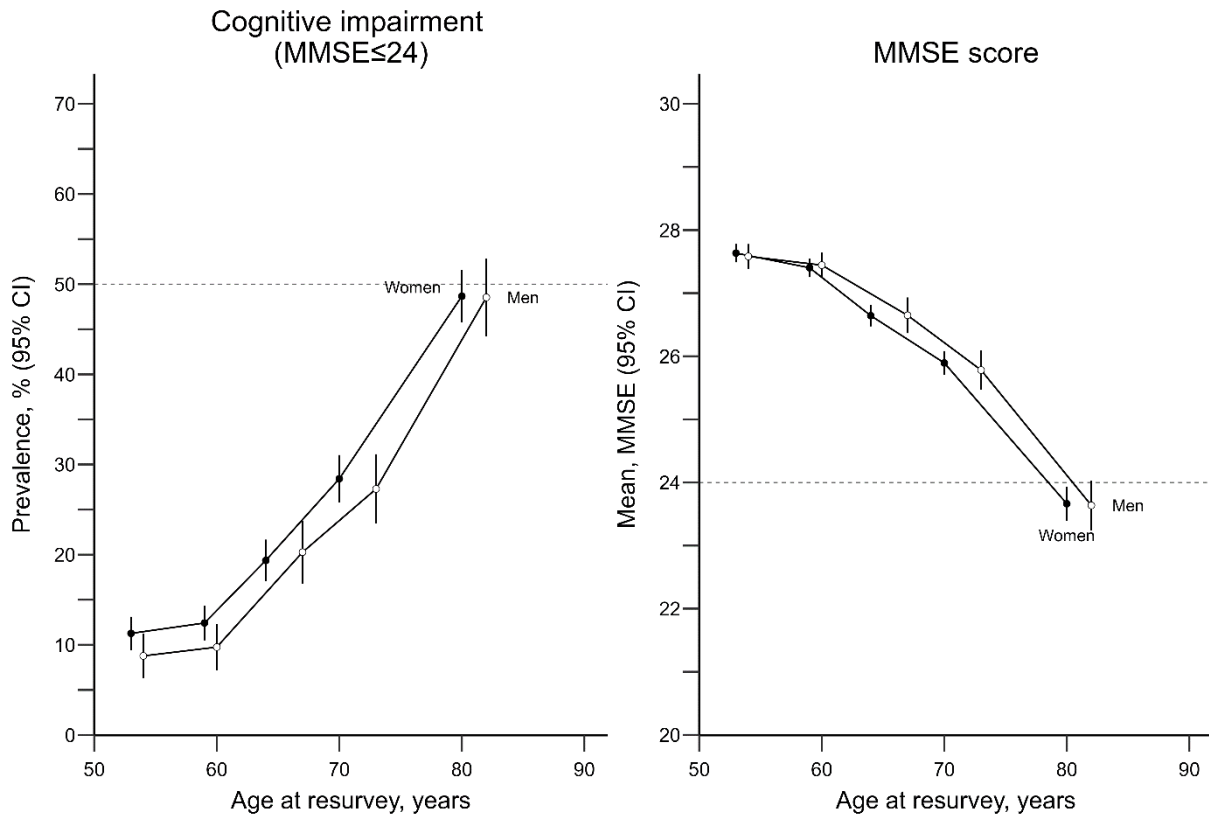

MMSE, Mini-Mental State Examination; CI, confidence interval. Each estimate is the average between participants from Coyoacan and Iztapalapa, yielding district-standardised age- and sex-specific estimates. Exclusions and conventions as per Table 1. Each point involves ~1050 women and ~470 men.

**Figure 2. Sex- and district- standardised prevalence of cognitive impairment in 7,628 participants aged 50 to 89 years at resurvey who reported having had some level of education with and without key metabolic risk factors, by age**

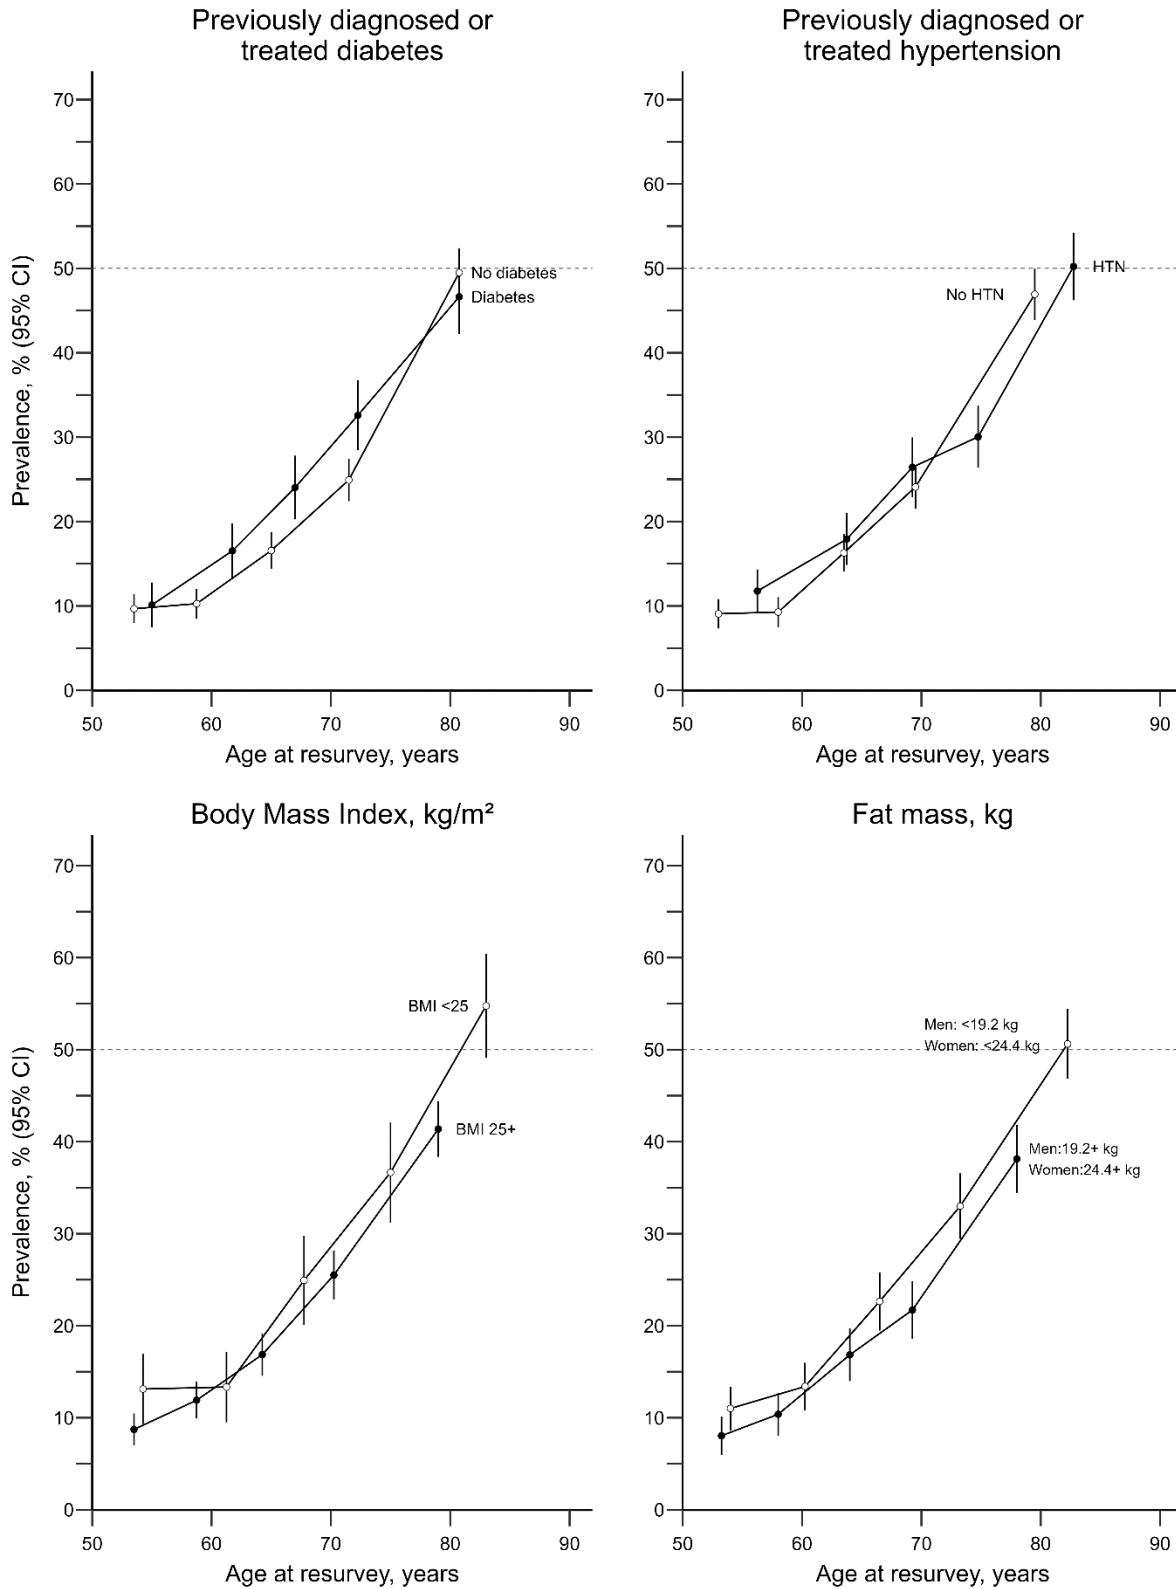

MMSE, Mini-Mental State Examination; CI, confidence interval; HTN, hypertension. Sex-specific median fat mass (19.1 kg for men and 24.4 kg for women) were used as cut-offs. Estimates shown among 8,197 participants for the top-row panels, 6,586 participants for the bottom-left panel, and 6,676 for the bottom-right panel.
